# Supplementary material for: Defining a positive work environment for hospital healthcare professionals: A Delphi study
Source: PLoS One. 2021 Feb 25;16(2):e0247530. doi: 10.1371/journal.pone.0247530 (PMC7906333; doi:10.1371/journal.pone.0247530)
Supplement: S1 Data — (XLSX) [file pone.0247530.s001.xlsx]

## Sheet: Elements emerged from literatur
	Element	Description	Original items and subscales	Reference		Number	Reference
1	Relational atmosphere	An atmosphere generated by certain behaviors and interpersonal relationships supporting the team spirit. An encouraging welcoming environment with mutual respect and mutual trust.	peer cohesion	1		1	Abraham IL, Foley TS. The Work Environment Scale and the Ward Atmosphere Scale (short forms): psychometric data. Percept Mot Skills. 1984; 58(1): 319-22.
			social relationships	4		2	Adams A, Bond S, Arber S. Development and validation of scales to measure organisational features of acute hospital wards. Int J Nurs Stud. 1995; 32(6): 612-27.
			relational atmosphere	8		3	Aiken LH, Patrician PA. Measuring organizational traits of hospitals: the Revised Nursing Work Index. Nurs Res. 2000; 49(3): 146-53.
			collegial behaviours	8		4	Appel P, Schuler M, Vogel H, Oezelsel A, Faller H. Short Questionnaire for Workplace Analysis (KFZA): factorial validation in physicians and nurses working in hospital settings. J occup med toxicol. 2017; 12: 11.
			staff relationships	13		5	Berndt AE, Parsons ML, Paper B, Browne JA. Preliminary evaluation of the healthy workplace index. Crit Care Nurs Q. 2009; 32(4): 335-44
			work group: pride	14		6	Bonneterre V, Ehlinger V, Balducci F, Caroly S, Jolivet A, Sobaszek A, et al. Validation of an instrument for measuring psychosocial and organisational work constraints detrimental to health among hospital workers: The NWI-EO questionnaire. International Journal of Nursing Studies. 2011; 48(5): 557-67
			work group: warmth	14		7	Clark CM, Sattler VP, Barbosa-Leiker C. Development and Testing of the Healthy Work Environment Inventory: A Reliable Tool for Assessing Work Environment Health and Satisfaction. J Nurs Educ. 2016; 55(10): 555-62.
			working relations	28		8	Duddle M, Boughton M. Development and psychometric testing of the Nursing Workplace Relational Environment Scale (NWRES). J Clin Nurs. 2009; 18(6): 902-9
			relationships with colleagues (micro level)	29		9	Erickson JI, Duffy ME, Ditomassi M, Jones D. Psychometric evaluation of the Revised Professional Practice Environment (RPPE) scale. J Nurs Adm. 2009; 39(5): 236-43.
			general relationships	32		10	Erickson JI, Duffy ME, Gibbons MP, Fitzmaurice J, Ditomassi M, Jones D. Development and psychometric evaluation of the Professional Practice Environment (PPE) scale. J Nurs Scholarsh. 2004; 36(3): 279-85.
2	Multidisciplinary collaboration	Good multidisciplinary relations and collaboration based on mutual respect and trust	relationships	1, 6,36		11	Estabrooks CA, Squires JE, Cummings GG, Birdsell JM, Norton PG. Development and assessment of the Alberta Context Tool. BMC Health Services Research. 2009; 9: 234.
			collaboration with medical staff & other health care professionals	2		12	Flint A, Farrugia C, Courtney M, Webster J. Psychometric analysis of the brisbane practice environment measure (B-PEM). J Nurs Scholarsh. 2010; 42(1): 76-82.
			Nurse-physician relationships	3		13	Friedberg MW, Rodriguez HP, Martsolf GR, Edelen MO, Bustamante AV. Measuring workplace climate in community clinics and health centers. Med Care. 2016; 54(10): 944-9.
			staff relationships with physicians	10		14	Gagnon S, Paquet M, Courcy F, Parker CP. Measurement and management of work climate: Cross-validation of the CRISO Psychological Climate Questionnaire. Healthc Manage Forum. 2009; 22(1): 57-65.
			staff relationships with physicians, staff and hospital groups	16		15	Ives-Erickson J, Duffy ME, Jones DA. Development and psychometric evaluation of the patient care associates' work environment scale. J Nurs Adm. 2015; 45(3): 139-44.
			RN-MD relationships	22		16	Ives Erickson J, Duffy ME, Ditomassi M, Jones D. Development and Psychometric Evaluation of the Professional Practice Work Environment Inventory. J Nurs Adm. 2017; 47(5): 259-65.
			collegial nurse physician relations	23, 24		17	Jansson von Vultée PH. Healthy work environment--a challenge? Int J Health Care Qual Assur. 2015; 28(7): 660-6.
			interdisciplinairy relations	26		18	Kalisch BJ, Lee H, Salas E. The Development and Testing of the Nursing Teamwork Survey. Nursing Research. 2010; 59(1): 42-50.
			relations between paramedical professionals	31		19	Kennerly SM, Yap TL, Hemmings A, Beckett G, Schafer JC, Borchers A. Development and Psychometric Testing of the Nursing Culture Assessment Tool. Clin Nurs Res. 2012; 21(4): 467-85.
			relations with and between doctors	31		20	Klingle RS, Burgoon M, Afifi W, Callister M. Rethinking how to measure organizational culture in the hospital setting: The Hospital Culture Scale. EVAL HEALTH PROF. 1995; 18(2): 166-86.
			nurse colleagues, midwife collegeagues, physician collegeas	34		21	Kobuse H, Morishima T, Tanaka M, Murakami G, Hirose M, Imanaka Y. Visualizing variations in organizational safety culture across an inter-hospital multifaceted workforce. J Eval Clin Pract. 2014; 20(3): 273-80.
3	Autonomy	Autonomy in accomplishing tasks and making decisions (within the own work area )	autonomy	1,3,22,28,36		22	Kramer M, Schmalenberg C. Development and evaluation essentials of magnetism tool. J Nurs Adm. 2004; 34(7-8): 365-78.
			job control	4		23	Lake ET. Development of the practice environment scale of the Nursing Work Index. Res Nurs Health. 2002; 25(3): 176-88.
			leadership and autonomy in clinical practice	10		24	Li YF, Lake ET, Sales AE, Sharp ND, Greiner GT, Lowy E, et al. Measuring nurses' practice environments with the revised nursing work index: Evidence from registered nurses in the veterans health administration. Res Nurs Health. 2007; 30(1): 31-44.
			job: autonomy	14		25	Mays MZ, Hrabe DP, Stevens CJ. Reliability and validity of an instrument assessing nurses' attitudes about healthy work environments in hospitals. J Nurs Manage. 2010; 19(1): 18-26.
			autonomy and control over practice setting	16		26	McCusker J, Dendukuri N, Cardinal L, Katofsky L, Riccardi M. Assessment of the work environment of multidisciplinary hospital staff. Int J Health Care Qual Assur. 2005; 18(7): 543-51
			general role responsibilities, autonomy	32		27	McSherry R, Pearce P. Measuring health care workers' perceptions of what constitutes a compassionate organisation culture and working environment: Findings from a quantitative feasibility survey. J Nurs Manag. 2018; 26(2): 127-39.
4	Control over practice setting	Sufficient interorganizational professional status to influence others and to deploy resources when required	control	1		28	Pena-Suarez E, Muniz J, Campillo-Alvarez A, Fonseca-Pedrero E, Garcia-Cueto E. Assessing organizational climate: Psychometric properties of the CLIOR Scale. Psicothema. 2013; 25(1): 137-44.
			nurses influence over ward management, timing of ward and patient events & financial and human resources	2		29	Rafferty AM, Philippou J, Fitzpatrick JM, Pike G, Ball J. Development and testing of the 'Culture of Care Barometer' (CoCB) in healthcare organisations: a mixed methods study. BMJ Open. 2017; 7(8): e016677.
			control over the practice setting	3		30	Reid C, Courtney M, Anderson D, Hurst C. Testing the psychometric properties of the Brisbane Practice Environment Measure using Exploratory Factor Analysis and Confirmatory Factor Analysis in an Australian registered nurse population. Int J Nurs Pract. 2015; 21(1): 94-101.
			control over practice	10		31	Saillour-Glenisson F, Domecq S, Kret M, Sibe M, Dumond JP, Michel P, et al. Design and validation of a questionnaire to assess organizational culture in French hospital wards. BMC Health Services Research. 2016; 16: 491
			autonomy and control over practice setting	16		32	Schroder C, Medves J, Paterson M, Byrnes V, Chapman C, O'Riordan A, et al. Development and pilot testing of the collaborative practice assessment tool. J Interprof Care. 2011; 25(3): 189-95.
			control over nursing practice	22		33	Siedlecki SL, Hixson ED. Development and psychometric exploration of the Professional Practice Environment Assessment Scale. J Nurs Scholarsh. 2011; 43(4): 421-5
			engagement & empowerment	35		34	Stahl K, Schirmer C, Kaiser L. Adaption and Validation of the Picker Employee Questionnaire With Hospital Midwives. J Obstet Gynecol Neonatal Nurs. 2017; 46(3): e105-e17.
5	Leadership	The actions of formal and informal leaders in an organization (or unit) to influence change and excellence in practice	authentic leadership	5		35	Upenieks VV, Lee EA, Flanagan ME, Doebbeling BN. Healthcare Team Vitality Instrument (HTVI): developing a tool assessing healthcare team functioning. J Adv Nurs. 2010; 66(1): 168-76.
			leadership	11		36	Whitley MP, Putzier DJ. Measuring nurses' satisfaction with the quality of their work and work environment. J Nurs Care Qual. 1994; 8(3): 43-51.
			leadership: work facilitation	14		37	Wienand U, Cinotti R, Nicoli A, Bisagni M. Evaluating the organisational climate in Italian public healthcare institutions by means of a questionnaire. BMC Health Serv Res. 2007; 7.
			organisational values (macro level)	29
			taking account of the individual in group	31
			leadershipstyle in the unit	37
6	Supportive organisational atmosphere	The organization is aware of the unique interests of various professionals and acts accordingly	organizational support	3
			organization: support	14
7	Supportive manager	Managers who support and coach professionals	supervisory support	1,26
			ward leadership: team building skills of team leader	2
			lack of support from administration	6
			lack of support from senior nurse	6
			flexibility of management support	12
			supportive leadership	16
			team leadership	18,32
			supportive nurse manager: managerial behaviors	22
			supportive nurse-manager: leadership behaviors	22
			nurse manager ability, leadership and support of nurses	23
			nurse manager leadership	24
			support	27
			management support	30
			support from the department head	31
			immediate superior	34
8	Supportive coworkers	Positive and helpful behavior between colleagues.	team support	29
			back up	18
9	Teamwork	Respectful, effective and efficient cooperation on a common purpose	cohesion amongst nurses	2
			teamwork and collaboration	7
			teamwork	10,13,16,21
			work group: cooperation	14
			team orientation	18
			collaboration	20
			team work	26
			cooperation	28
			team spirit	37
10	Staffing adequacy	Enough staff for carrying out the work / providing good patient care	staff organisation	2
			staffing inadequacy to perform duties	6
			sufficient staff, time and resources for quality patient care	16
			adequacy of staffing	22
			staffing and resource adequacy	23
			staffing adequacy	24
			workforce	27
11	Professionalism & competency	Caregivers act professionally and competently	excellence in nursing practice	5
			professional commitment	19
			clinically competent nurses/support for education	22
			nursing foundations for quality of care	23
			professionalism	26
			professional aims	31
12	Respect	Colleagues appreciate each other and accept each other as they are	respect	7
			cultural sensitivity	16
			teamworks	19
13	Workload	The amount of work that has to be done within a certain amount of time and the fysical and mental burden it costs	work pressure	1
			quantitative work demands	4
			workload management	7
			clinic workload	13
			workload	14,31
			work-related exhaustion	17
			mental energy	17	First defined as separate category (level of stress), in R3 delphi merged with the category workload
			workloads	30
			work exhaustion	31
			workload	34
			role enhancement	36
14	Scheduling	Flexibility in roster and work-life balance	changes of planned days-off and vacations	6
			workhours and work-life balance	28
			rostering	30
			duty roster, overtime	34
15	Professional development	Possibilities for developing competencies, expertise and skills needed to improve performance in a profession	opportunities for participation and professional development	4
			professional development and orientation	5
			mentoring programm,	7
			professional grown and development	7
			professional development	12,30
			professional growth	21
			professional practice	27
			education and training	34
			training and development	37
16	Career advancement	Opportunities for promotion and career development	career advancement	7
			opportunity for advancement	24
17	Organisational learning	An organization that learns from mistakes / unexpected events and continuously improving	leadership: goal emphasis	14
			organisational learning	31
18	Personal development	Opportunities for personal growth	personal growth	1
			personal growth and identity	20
19	Structural and Electronical Resources available	The availablity of enough structural, material and electronic resources to do your work	quality of ward services	2
			workplace environment	4
			stuctural and electronical resources	11
			sufficient staff, time and resources for quality patient care	16
			resource allocation prioritization	21
			support structures	35
20	Celebrating achievements	Celebrating accomplishments and successes	celebrating achievements	7
21	Rewards	Incentives and employee employee benefits system	rewards	7,28
			performance assessment and rewarding systems	37
22	Job satisfaction	Satisfaction with the content of work, salary and secondary employment conditions	job satisfaction	2, 8, 37
			satisfaction	7, 19
			work satisfaction; satisfaction at work	17,31
			engagement: overall job satisfaction	34
			benefits	36
23	Open communication	Equal and open (blamefree) communication and feedback between professionals and different levels in an organization	low level of communication in the work unit	6
			respectful communication	7
			communication	19, 25
			inter-sectional collaboration	21
			relation and communication in department	31
			communication and information exchange	32
			team communication	35
			organisational communication	37
24	Level of stress	A disturbed balance between the employee's experienced workload and the workload imposed by the company.	mental energy	17	merged with 'workload'
25	Conflict management	Ability to resolve conflicts	conflict resolution	7
			effects of conflict	8
			handling disagreement/ conflict	10
			handling disagreement and conflicts	16
			conflict management	31
			decision-making and conflict management	32
26	Trust	The extent to which employees trust the organization, their supervisors, and their coworkers	trust	7, 18
			leadership: trust & support	14
27	Participation in policy making at organisational level	Opportunity for all employees to participate in policy decisions	involvement	1
			shared governance	7
			nurse participation in hospital affairs	23
			participation	28
28	Incident reporting & handling of errors	An easy-to-use system for reporting and analyzing incidents and based on this start improvements	free reporting errors and mutual help to prevent	21
			service delivery	27
29	Shared vision, mission	The organization has a clear mission, vision and goals that are known to employees	low level of shared values about work between members in the unit	6
			shared vision, mission	7
			passion for mission	21
			mission, meaningful purpose, goals	32
			engagement	34
30	Patient centered culture	The care is tailored to the patient and his loved ones' values, preferences and needs	cultural sensitivity	16
			relationships with patients and their family	31
			patient involvement	32
31	Feeling valued	Others give you the feeling that your effort and contribution is valuable	feeling valued-not valued	12
			job importance	14
			hospital management values work	34
			work worth	36
32	Performance measurement	Measuring quality performance and patient outcomes	evaluation	11
			QI orientation	13
			improvement orientation	21
			perceived results of running of department	31
33	Self-care	Attention for health and well being of employees	welness and self care	7
34	Job retainment	Attractiveness of the organization and retention of staff	attract and retainment	7
			attachment to the job	28
			likelihood of remaining on staff	31
35	Employees as valuable partners	employees are viewed as assets and valued partners	employees as valuable partners	7
			social capital	11
36	Adequate authorization & clear chain of command	Clear formal hierarchical leadership and clarity in descision making	manager readiness for change	13
			shared mental model	18
			responsebility and authority	21
			perceived efficiency of the department	31
			coordination within department	31
37	Physical comfort	Attention to physical working conditions with, for example, support materials (e.g. hoists)	physical comfort	1
			workplace environment	4
38	Information distrubution	Information needed to perform the work is distributed and shared	communication about patients	16
			information sharing	21
			diffusion of information	31
			community linkages and coordination of care	32
			hospital management communicaties changes	34
			team communication	35
39	Working according to guidelines	Working according to professional standards and guidelines	acceptance of department standards	31
40	Working conditions	The ability of employees to do their job within time and resources	frequent interruptions in tasks	6
			job constraints (micro level)	29
41	Role clarity	Having an understanding about the duties, responsibilities and competences.	clarity	1
			role clarity	14
			role conflict	14
			behaviors	19
42	Internal work motivation	intrinsic motivation completely independent of external factors such as salary, colleagues or supervision	internal work motivation	10
			work motivation	16
43	Cultural values	Attitude, behaviour and policy: the way that 'we do things' in the organization and work units	cultural Sensitivity	10
			culture	11
			cultural values	22
			type of behaviour encouraged in the depart.	31
44	Innovation and change readiness	Innovation is encouraged and employees and management are willing to change	innovation	1,28
			free expension of ideas	7
			organizational slack: time; space; human resources	11
			staff readiness for change	13
			organization: innovation	14
45	Justice	Appropriate and fair way of making decisions	organization justice	14
46	Task orientation	A clear division of tasks	task orientation	1
			variability	4
			expectations	19
			work organization	28
47	Challenging and fun work	Having fun and being challenged at work	engagement	7
			job challenge	14
48	Safety climate	The perception of a safety culture	improving patient safety	30
			out of depth	35
