# Supplementary material for: Defining a positive work environment for hospital healthcare professionals: A Delphi study
Source: PLoS One. 2021 Feb 25;16(2):e0247530. doi: 10.1371/journal.pone.0247530 (PMC7906333; doi:10.1371/journal.pone.0247530)
Supplement: S2 Data — (XLSX) [file pone.0247530.s002.xlsx]

## Sheet: Elements emerged from interview
No	Factor	Description	Interviewee	Quote - Dutch / Flemish	Quote - English
1	Relational atmosphere	An atmosphere generated by certain behaviors and interpersonal relationships supporting the team spirit. An encouraging welcoming environment with mutual respect and mutual trust.	3	Dus mensen ervaren een positieve werkomgeving als ze goede relaties hebben met hun peers, dus met hun eigen team	So, people feel they have a positive working environment if they have good relationships with their peers, like their own team.
			6	Als het gaat om prettige werkomgeving, dan heeft het veel meer te maken met wat voor cultuur heerst er, wat voor collega's lopen er, hoe spreken we elkaar aan, hoe weten we wat het gewenste gedrag is en hoe bevorderen we dat gewenste gedrag	When it comes to a pleasant working environment, it has a lot more to do with the prevailing culture, the type of colleague, how we talk to each other, what we know about and encourage the expected behaviour?
			6	Als je een perfect paradijselijk ziekenhuis hebt, ruime kamers, lieve patiënten, allemaal groene daktuinen overal hè, maar een hele slechte sfeer in je team dan nog gaat het niet goed. Want dan ga je niet even om hulp vragen en dan ga je niet elkaar controleren en dan ga je niet samen even de schouders eronder zitten.	If you have a perfect paradise of a hospital, with spacious rooms, lovely patients, and green roof gardens everywhere… but a very bad atmosphere in your team, then things aren’t going well. Because then you’re not going to ask for help, you’re not going to check each other and you’re not going to sit down together.
			7	gewoon collegialiteit, sfeer, teamuitjes, alle leuke dingen op een afdeling.	… just collegiality, atmosphere, team trips, all the fun things in a department .
			11	Een hele andere en die is veel belangrijker: er zijn mensen, collega's en daarmee sfeer …..hoe is de sfeer, hoe wordt er met elkaar gewerkt? Wordt er ook gelachen? Is er ook aandacht voor iemand op het moment dat er een keer iets bijzonders is	Something completely different, but far more important: you have people, colleagues [who create a particular] mood… Wha’is the mood like, how do people work together? Is there laughter as well? Do people pay attention to special occasions?
			15	Goede sfeer	Good atmosphere
2	Multidisciplinary collaboration	Good multidisciplinary relations and collaboration based on mutual respect and trust	3	….maar ook heel nadrukkelijk met andere disciplines spelen daar een rol. Dus dat is zeg maar samenwerking, relatie speelt een belangrijke rol'	But also, very emphatically, other disciplines [factors] play a role. Things like cooperation, relationships, play an important role.
			8	als daar een goede werkrelatie is tussen verpleegkundigen en artsen, een vriendelijkheid	… when nurses and doctors have a good, friendly working relationship.
			8	Al is het maar het multidisciplinair overleg waar je elkaars inbreng hoort, dat je ook dat vertrouwen of nou ja dat je er van leert hoe een ander naar dingen kijkt, dus een andere specialist of een ander specialisme. En dat er dan altijd wel iemand zegt van: "Maar wordt de patiënt daar beter van? .....Los van als je alleen maar je eigen ding doet en een vragenlijstje indient voor de visite.	So long as it’s a multidisciplinary consultation, when you listen to each other's input and have confidence in being able to learn from how someone else looks at things, another specialist or [someone working in] another specialism. And that someone always asks: “But does it benefit the patient?”[...] Besides doing your own thing and submitting a questionnaire for the rounds.
			13	dat is dat er heel goed geleveld wordt tussen de verschillende disciplines. Dus dat er, ja, een gelijkschakeling is, of ge nu dokter bent, verpleegkundige bent of analist ben of whatever. Iedereen heeft zijn inbreng vanuit zijn discipline en dat wordt op gelijke waarde geschat. Dat is denk ik ook heel belangrijk	… that the different disciplines are on the same level. So that there is, yes, an equality, [no matter] whether you are a doctor, a nurse or an analyst, whatever. Everyone’s input from their own discipline is given the same value. I think that’s also especially important.
			14	En daar zie je ook dat er multidisciplinaire besprekingen zijn waarbij ook de evaluatie gebeurt van hoe doen wij het nu eigenlijk met elkaar, hoe doen wij dat nu samen? En ook leuke themabijeenkomsten om deskundigheid te bevorderen	Then you have multidisciplinary discussions where we evaluate how we actually work with each other, how do we do so-and-so together? And fun theme meetings as well to promote expertise.
			17	als je al visie op zorg hebt dat het een integrale aanpak moet zijn hè, dat de zorg, de uitkomsten resultaat is van zeg maar een goede samenwerking tussen dokter en verpleegkundige. Ja, als mensen het daar over eens zijn, zie je dat verschil nauwelijks meer. En dan wordt ook, dan voelt een medisch manager zich ook verantwoordelijk voor de kwaliteit van de verpleegkundige zorg, dus ook voor de kwa…	… if your idea of care is that it must have an integrated approach, that the outcome is the result of, say, good cooperation between doctor and nurse. Yes, if people agree on that, then you hardly see any difference anymore. And then the medical manager will feel responsible for the quality of the nursing care, including the quality of the nurses on the ward.
3	Autonomy	Autonomy in accomplishing tasks and making decisions (within the own work area )	1	dat je zelfstandig (tot zekere hoogte zelfstandig) kan nadenken over wat je wil doen en moet doen	… that you can think independently (to a certain extent) about what you want to do and should do.
			2	dat geprotocolleerd werken. Dat kan heel veel bieden, omdat je dan goed kijkt wat je per stap wat je doet. Maar mensen vinden het ook gewoon heel fijn om inderdaad zelf te observeren en conclusies te trekken en even te sparren met iemand of dat te laten zien.	Following work protocols: They can offer a lot, because then you look carefully at what you do step by step. But people also really like observing themselves and drawing conclusions and sparring with others or showing that [they could do so].
			3	kunnen wij keuzes maken als het gaat over kwaliteit van zorg waar wij prioriteiten leggen of is dat allemaal top-down ingegeven? Dus hè, werkomgeving heeft naar mijn idee ook heel veel te maken met de mate waarin je zelf sturing kunt geven aan je processen of dat alles al voor je is ingeregeld.	When it comes to quality of care, can we decide on the priorities , or is all that done top-down? I think the working environment has a lot to do with how much you can manage your own processes or whether everything has already been set up for you.
			5	dat jij de autonomie krijgt dat het je wordt toevertrouwd en ook dat wat je wordt toevertrouwd ook dat accepteert, aanneemt, zegt: dit wordt van mij.	… that you are given autonomy, that it is entrusted to you, and that you are trusted to accept, to take it on, to say: this is mine.
			8	Dat de medewerker inbreng heeft, dat de medewerker zeggenschap of invloed heeft op een werkindeling, de autonomie, de volgorde. En dat de stem van de werkvloer ook gehoord wordt.	… that the employee has input, has control over or can influence the work schedule, the autonomy, the sequence. And that the voice of people on the work floor is also heard.
			10	voor eigen inbreng, voor eigen regelruimtes en mogelijkheden	… for your own input, for your own regulations and opportunities.
			14	dat vind ik ontzettend leuk om dan te zien dat die medewerkers zelf gewoon bepalen waar ze prioriteiten leggen, zelf snappen dat ze tijd voor de patiënt moeten maken, hoe kunnen we tijd winnen, hoe kunnen we het efficiënter doen	I really like seeing those employees deciding where to set the priorities, understanding that they have to make time for the patient [and thinking about], where can we save time, how can we do things more efficiently?
4	Control over practice setting	Sufficient interorganizational professional status to influence others and to deploy resources when required	9	En twee is wel dat je natuurlijk de dingen die je voor elkaar wil krijgen, dat je die ook voor elkaar kunt krijgen. Tenminste dat is hier, als ik hier ben natuurlijk de plannen die we als stafbestuur hebben samen met de Raad van Bestuur dat je die uit kunt voeren.	The second point is, of course, that you want to get things done. At least here, when I’m here, of course, the plans that we, the staff board have [developed] together with the Board of Directors, that you can carry them out.
			12	twee is eigenlijk heel het empowerment verhaal….Dat wil dus zeggen dat ik de sleutels krijg om te bepalen	Two is actually the whole empowerment story… meaning that I get the keys to decide on things.
			14	Die hebben wel behoefte aan eigen regie, ze hebben wel behoefte om hun eigen dienstrooster te maken, ze hebben wel behoefte om hun eigen overleg in te richten, zelf grip op werkzaamheden te doen, natuurlijk dat allemaal wel	They do feel the need to manage themselves, to set their own roster and their own consultations, to get a grip on activities themselves, all of that of course.
5	Leadership	The actions of formal and informal leaders in an organization (or unit) to influence change and excellence in practice	2	Ik denk dat mensen zelf eigenlijk heel veel zouden kunnen en daardoor ook beter profileren op de werkvloer. En nou, dan krijg je zelfvertrouwen en ook beter werk, denk ik.	I think that people can actually do a lot for themselves and thus profile themselves better in the workplace. Well, then you gain confidence and work better work, I think.
			3	dat positieve werkklimaat en dat vooral ook het gezamenlijk verantwoordelijkheid nemen. Dus je zegt niet van: "Joh, dat probleem is er niet", of: "Dat probleem zie ik niet", of: "Dat probleem of dat vraagstuk is allang helder". Dat is natuurlijk heel vaak de reactie: "O, dat hebben we al heel vaak geprobeerd, ach nee dat weten we al hè , daar wordt toch niks aan gedaan." Nee, je blijft eigenlijk …	… that positive working climate and, above all, joint responsibility. So then, you don't say, “Well, it’s not a problem,” or, “I don't see the problem,” or, “That problem or question was cleared up long ago.” This, of course, is often the response: “Oh, we’ve tried that many times, oh we know that, but nothing’s being done about it.” No, actually you’re always trying to understand things out of a…
			5	echte goede leiderschap zit hem in het feit dat je mensen in collaboratives in elkaar kan hebben, waarbij je zowel het tribale als het teamverhaal aan elkaar weet te koppelen	Real, good leadership lies in the fact that you can assemble people in collaboratives so that you can connect both tribal and team stories.
			6	En dáárvoor heb je weer leiderschap nodig, want het zijn de hiërarchisch leidinggevenden en de, hoe moet je dat in het Nederlands noemen, zeg maar de onofficiële leiders van een afdeling die heel erg sfeerbepalend kunnen zijn.	And for that, again, you need leadership because the hierarchical leaders and the – what do we call them in Dutch? – let’s say, the unofficial leaders of a department set the mood.
			8	leiderschap is ook, bedoel ik ook voor de verpleegkundigen die dan zeggen: "Hé, maar dit is raar dat we dat bedacht hebben, volgens mij moet dat anders kunnen.	Leadership is also… I mean for the nurses who say: “Hey, isn’t it strange that we came up with that? I think we could do it differently.”
			12	het heeft veel te maken met leiderschap,	It has a lot to do with leadership.
			14	Ik heb niet de illusie, iedere dag dat ik in dit ziekenhuis rondloop dat ik iedere dag dat ziekenhuis heel erg ga sturen. Ik hoop veel meer dat die medewerkers, de dokters zelf, door middel van perceptie dat die moet weten wat die moet doen. En er zijn een aantal dingen die ik kan doen, maar mensen zullen het zelf moeten doen.	Every day I walk round this hospital, I don't have any illusion that I’m going to direct things that rigidly. Rather, I hope that the staff, the doctors, have the experience to know what they should be doing. There are several things I can do, but people should do things for themselves.
			16	only avialable in english	That’s particularly important. Leadership style and culture, we know that makes a huge difference to, like, the different aspects of environment, the psychological, if you like, atmosphere, and it's very important to attribute something to the environment and how enabling and encouraging the leader is in engaging people in enthusiasm.
			17	Je hebt gewoon rolmodellen nodig, voorbeelden nodig, mensen die een visie hebben, mensen die een sfeer weten te creëren van vertrouwen. Dat je inderdaad dingen fout mag doen hè	You just need role models, examples, people with vision, people who know how to create an atmosphere of trust. That you’re allowed to make mistakes.
			17	Dus leidinggeven, goed leiderschap, hè want leiding geven kan iedereen wel een beetje, je kunt iedereen wel vertellen wat hij moet doen. Maar leiderschap hè, dat is mensen in hun kracht zetten, coachen en dienend, maar ook kritisch, op resultaten gericht leiderschap	So, [it’s] leadership, good leadership, because everyone can lead a little bit, anyone can tell someone else what to do. But leadership, aye, that’s empowering, coaching and serving people, but it’s also being critical, results-oriented leadership.
6	Supportive organisational atmosphere	The organization is aware of the unique interests of various professionals and acts accordingly	1	Dat er vanuit de werkgever ook de, niet alleen het besef, maar ook de wens, de wil moet zijn om de zaak goed te regelen voor z'n werknemers	The employer must not only have the awareness, but also the desire, the will to arrange matters properly for their employees.
			5	De waardering zit hem in het feit dat je meesterschap mag bereiken in je vak en dat je bepaalde patiëntenproblemen, patiënten aan jou worden toevertrouwd en dat je daar je meesterschap mag laten zien	The appreciation lies in the fact that you can master your profession and be entrusted with certain patient problems and patients, and that you can show your mastery in there.
			4	Als je een klote Raad van Bestuur hebt, ja, dan is er geen positieve werkomgeving, dan gaat de werksfeer gaat ook, de werkomgeving zal ook minder goed zijn	If you have a rotten Board of Directors, well yes, then there is no positive working environment. Then the working atmosphere will also go [down], the working environment will also be less good.
7	Supportive manager	Managers who support and coach professionals	1	dat je, nou gewoon, je aansturing hebt	Just that you have management…
			2	Ik denk dat er leidinggevenden een open houding moeten hebben in de zin van dat slag van vragen kunnen stellen.	I think that leaders should have an open mind in the sense of being open to questions.
			3	dat eigenlijk de rol van de leidinggevende heel erg bepalend is voor de werkomgeving	… actually the role of the manager determines the working environment.
			4	hoe staat zo'n leiding erin? Wie is je baas? Motiveert hij? Kan hij een zekere rust in de omgeving creëren	What kind of management is it? Who’s your boss? Do they motivate? Can they create a certain harmony in the environment?
			7	alles klopt: de leidinggevende klopt, het team is coherent, de sfeer is goed en als er projecten gedaan moeten worden, wordt dat opgepakt. Die werkt aan sfeer, die werkt aan team, die werkt aan cultuur, aan openheid, aan veiligheid, die verleent nazorg als er een calamiteit is geweest, maar die zorgt ook voor die fysieke werkomgeving.	Everything is right: proper management, coherent team, the atmosphere is good and when projects have to be done, they get done. The atmosphere works, for the team, the culture, on openness, on safety, on providing aftercare in the case of emergency, but it also looks after the physical working environment.
			8	maar ook de faciliteiten van ondersteund worden door je leidinggevende	… but also, the capacity of being supported by your manager.
			10	Dus ik denk dat dat wel echt een negatieve cultuur is. Hoe het precies vorm krijgt, of het dan een hele negatieve leidinggevende die heel erg directief is en dingen oplegt of het in de artsenomgeving de AIOS-sen of de co of de anderen zijn die afgesnauwd worden omdat ze iets niet goed doen	So, I think that's a really negative culture. How exactly does that happen? If [you have] a really negative manager who’s very bossy and imposes things, or in the doctor's environment, if an AIOS [trainee specialist] or a co-assistant or others get snubbed because they do something wrong…
			12	Dat is wat nu niet werkt dat is dat een management met zichzelf bezig is, totaal geen voeling heeft met het terrein, niet weet over wat dat het gaat, en die zich alleen met balansen bezig houdt	What doesn’t work is a management that is only concerned with itself, that has no feeling for the field whatsoever, doesn’t know what it’s about, and only deals with the balance sheet.
			12	Dat is een menselijke behoefte hè, dat is zo'n basisbehoefte, als ge met mensen samenwerkt, dat ge elkaar verstaat, dat ge ze ruimte geeft, dat ge het talent benut	It’s a human need, such a basic need when you work with people, that you understand each other, that you give people space, that you use their talent….
			14	Wat mensen willen is dat de leidinggevende goede randvoorwaarden schept, zodat je goed je werkzaamheden kunt doen. Hè, dus dat je goede spullen hebt, dat je voldoende financiën hebt om dingen te regelen. Dat je goede afspraken met je dokters hebt over visite lopen. Dat je goede spullen hebt om dingen te doen. Dus dat pad, en of ze goed salaris krijgen, dus dat ze al die dingen goed... Dat ze goed…	People want management to set good conditions so that you can do your job well. So that you get the good stuff, that you have enough budget to arrange things. That you have good agreements with your doctors about visiting. That you have the stuff to do good things: that path, a good salary. So if they [management] get all of that right, they [employees] get good training. That’s what employees ne…
			16	only avialable in english	Well I think the more positive environment is one where you feel supported [and have] a positive relationship with your own manager, because that's where you get your support from.
			16	only avialable in english	I mean it's not reasonable for people to feel motivated […] if they feel they don’t have the back up of their manager.
8	Supportive coworkers	Positive and helpful behavior between colleagues.	2	dat het zo druk is dat je eigenlijk niet meer zo goed weet waar je moet beginnen en dat een ander dan kan zeggen: "oké we gaan..."	… when it’s so busy that you really don’t know where to start anymore and someone else can say: “Okay let’s do....”
			4	verder is ongelofelijk belangrijk wie je collega's zijn en wat voor personen dat zijn	Who your colleagues are, what kind of people they are, is also incredibly important.
			6	Als het team lekker draait, vangt het elkaar op	When the team runs smoothly, we look after each other.
			9	wees goed voor elkaar. Niet alleen voor de patiënten, maar ook voor elkaar	Be good to each other, not just the patients, but also to one another.
			10	met je collega's een bepaald gevoel van veiligheid met elkaar, steun voor elkaar	… have a certain sense of security with your colleagues, support each other.
			16	only avialable in english	… a positive relationship with your own manager. Because that’s where you get your support from, as well as from colleagues.
			17	Dus een hele open veilige cultuur waar je met elkaar de dingen van de dag ervoor kunt bespreken en heel open kunt praten over de dingen die eigenlijk beter hadden gemoeten of misschien wel heel goed zijn gegaan, waar je elkaar complimenten wil geven	So, a very open safe culture [is] where you can discuss things from the day before and talk openly about things that should have been done better or perhaps went well; where you want to give each other compliments.
			17	En waar je ook op een gegeven moment een sfeer hebt, dat iemand, verpleegkundige of een arts-assistent of een medisch specialist kan zeggen van: "Joh, geef mij die taak vandaag maar niet, want ik heb gewoon een rotavond gehad gisterenavond of een vervelende aanvaring heb ik gehad en ik voel me gewoon niet, vandaag niet prettig. Ik	And where you have [the kind of] atmosphere when at some point, someone, a nurse or a doctor's assistant or a medical specialist can say, “Please don't give me that job today” maybe because they’ve had a bad night or a nasty accident or just don’t feel well today.
9	Teamwork	Respectful, effective and efficient cooperation on a common purpose	1	Dat je collega's hebt waar je mee kan samenwerken; ik weet me heel erg gesteund door een team waar ik in zit die allemaal dezelfde kant op aan het werken zijn en enthousiast, veel commitment hebben en tot samenwerking bereid'.	… that you have colleagues you can work with. I get great support from the team I’m in. All of us are working in the same way. We’re keen, have a lot of commitment and we’re prepared to cooperate.
			2	En dat je met elkaar naar iets toe werkt, dat het beter wordt.	… and that you work together to [achieve] something, that it gets better.
			4	Ik denk, en verder wat je heel erg bepaalt is het team waar je in werkt. Hè, dat als je daar gedoe in hebt, gaat het je minder goed, of gaat het je team minder goed of gaat het je organisatie minder goed. En als jij, als dat oké is of goed geregeld is en er is inderdaad werkelijk een team. Ja, dat vind je fijn, daar floreer je onder en dan ga je met plezier.	I think, what really determines things is the team you work in. Hey, if you have a hassle with that, if you’re not doing so well, or your team is not doing so well, or your organization is not doing so well… But if you, if all that's okay or well organized, then there is indeed a team. Yes, you like that, you flourish under that and then work is a pleasure.
			5	je mensen zo moet organiseren dat ze ook iets met elkaar hebben. Dat kan je een team noemen.	You must organize people in such a way that they [can connect] with each other. Then you can call them a team.
			5	Een team is een groep mensen met verschillende kennis en vaardigheden, met een gedeeld doel en met een commitment om dat doel te bereiken en een accountability naar zichzelf en het team toe op het doel te bereiken	A team is a group of people with different knowledge and skills, with a shared goal and the commitment to achieve that goal, who take responsibility for themselves and the team in pursuing that goal.
			8	We hebben hier voor de grap gezegd een zeilboot. Je kan niet allemaal aan het stuur, je kan ook niet allemaal op links gaan zitten, je kan ook niet allemaal op rechts gaan zetten. Dus ik hoop dat het lukt om die mantra erin te krijgen: ieder z'n ding.	Take a sailboat as a silly example. You can’t all be at the helm, you can’t all sit on the left, and you can’t all sit on the right. I hope this manages to instil the mantra [in people]: to each their own [skill/talent/task/specialism].
			9	teamwork en dat daar werkomgeving ook een essentieel aspect van is.	… teamwork is an essential aspect of the working environment.
			15	Dat gaan ze zelf wel ontdekken, want ze zijn met elkaar aan het samenwerken en van daaruit vinden ze zelf wel uit wat ze kunnen verbeteren.	They’ll discover that for themselves, because they’re working together and so they’ll find out for themselves what they can improve.
			15	Teamsamenwerking, dat mensen wat voor elkaar over hebben en dat ze samen er voor willen gaan	Team collaboration, that people are willing to do something for each other and that they want to go for it together.
10	Staffing adequacy	Enough staff for carrying out the work / providing good patient care	10	echt substantieel veel te veel diensten zou draaien, overwerken of anderszins een heel groot tekort hebt op een afdeling. Nou ja, dat zijn natuurlijk werkomgevingen die gewoon niet bevorderend werken, die echt negatief zijn,	… [where] they’d run substantially too many shifts, [with lots of] overtime, or there’d be a really large [staff] shortage in a department. Well, of course, those work environments are just not stimulating, they’re really negative.
			16	only avialable in english	So, first, that’s in recognizing that a well-staffed unit is an essential precondition for other things to unfold. That's kind of the basic building block.
11	Professionalism & competency	Caregivers act professionally and competently	7	ik als verpleegkundige ben integraal verantwoordelijk voor de voedingstoestand van de patiënt die aan mij is toevertrouwd….. Dus ik denk dat de mate van professionaliteit van een team, dus, ja dat dat ook een aspect is van working environment.	As a nurse I am fully responsible for the nutritional status of the patient entrusted to me […] so I think the degree of professionalism of a team, yes, that’s also an aspect of working environment.
			11	degene die bezocht werd en ondertussen de verpleging daarmee bezig, maar de verpleging was over het hoofd van de patiënt heen over uitgaan en over het laatste feestje en over een tatoeage en dat soort dingen. En jij en ik als je dat weet dan weet je al dat is niet de beste werkomgeving. Ook al wordt er zo gebabbeld, het is niet de meest professionele en daarmee zullen ze ook niet de beste aandach…	… the one who was being visited [the patient], where the nursing was happening, but while this was going on the nurses [were chatting] over the patient's head about going out and the last party they’d been to, and getting a tattoo and stuff like that. And you and I know that that is not the best working environment. When they chatter like that, it’s not the most professional [behaviour]. They won…
			12	Als ik het vanuit verpleegkundig standpunt zie, gaat het erover dat ge als professional zijt opgeleid met een bepaalde opdracht. Ge wilt die invullen en het probleem is van oké, welke barrières ontmoet ik om die in te vullen	When I look at it from a nursing point of view, it’s about being trained as a professional to deal with a certain task. You want to do it and the problem is what must I overcome in order to achieve it?
			14	Hoe kan ik nou het woord voeren als ik in een werkoverleg zit met 20 verpleegkundigen of 15? Hoe kan ik mijn punt nou goed maken? En dat het ook gehoord wordt, hoe doe ik dat nou? Dat is best lastig als je dat niet geleerd hebt. En dat bepaalt natuurlijk ook heel erg, die werkcultuur, klimaat, sfeer op een afdeling, waar verpleegkundigen natuurlijk heel erg gevoelig voor zijn	How can I speak up when I’m in a work meeting with 15 or 20 nurses? How can I make my point clearly? So that it gets heard, how do I do that? It’s quite difficult if you haven’t learned how. And the work culture, climate, atmosphere in a department, to which nurses are very sensitive, of course it has a huge influence on all that.
12	Respect	Colleagues appreciate each other and accept each other as they are	8	respect in een werkomgeving	… respect in the working environment.
13	Workload	The amount of work that has to be done within a certain amount of time and the fysical and mental burden it costs	1	En ondertussen maak je je toch wel een beetje druk over funding, over dingen die je af moet hebben die je, waar je te weinig tijd voor hebt	Meanwhile, you do worry a bit about funding, about the things you must finish that you don't have enough time for….
			3	Wij nemen teveel risico's en wij accepteren dat de werkdruk veel te hoog is.	We take too many risks and we accept a workload that is too high.
			8	het ging over werkdruk hè: Wat kan je zelf doen om je werkdruk te verlagen? En dan komen wel werkoverlegsuggesties uit om de kleine verbeteringen vanuit de vloer te doen.	Regarding workload: what can you do to reduce your workload? And then you get suggestions for making small improvements on the work floor coming out of the work consultation meetings.
14	Scheduling	Flexibility in roster and work-life balance	8	Dat je roostersysteem dat je daarin invloed op hebt. En dat is makkelijker in een groot team, dan in een klein team natuurlijk	That you have a say in your roster system. That’s easier to do in a large team than in a small team.
			17	En als jij geen ruimte krijgt om te werken aan kwaliteitsvraagstukken omdat het niet ingepland wordt in de werkzaamheden en het ernaast gedaan moet worden, dan heb je dus, creëer je geen goede werkomgeving.	If you don’t get the time to work on quality issues because it’s not in the planning, so it has to be done on the side, then you don’t have a good working environment.
15	Professional development	Possibilities for developing competencies, expertise and skills needed to improve performance in a profession	3	cao-achtige zaken als hoeveelheid tijd en geld die er beschikbaar ook is om mensen zich te laten ontwikkelen	… collective [union] agreements on such matters as the amount of time and money available to allow people to develop.
			8	ondersteund worden dat je kan leren	Being supported so that you can learn…
			10	En dat moet je blijven scholen, blijven ontwikkelen, daar moet je de ruimte voor hebben dat je, nou als verpleegkundige zal je dat zeker onderschrijven, dat je patiënten zo kan verzorgen of ondersteunen en faciliteren zoals je denkt dat dat goed is voor die patiënt	And you have to keep on training, [professional] development, you have to have the space for that. Well, as a nurse you would certainly endorse that, so that you can care for or support and facilitate patients in the way that you know is good for that patient.
			13	leren, het voortdurend mogen leren;….kijk in Vlaanderen faciliteert de werkgever veel minder in leren, maar beschouwt de professional het eigenlijk als iets wat tot zijn professionaliteit behoort dat hij of zij zich bijschoolt. Dus het is het stimuleren dat men het zelf doet, maar ook wel zorgen dat het mogelijk is. Ja	… learning, being allowed to do continuous professional development [CPD]. […] In Flanders the employer doesn’t facilitate ongoing learning that much, but the professional sees CPD as something that actually belongs to their professionalism. So, it involves encouraging people to do CPD for themselves, but it also means ensuring that it is possible.
			16	only avialable in english	… and then, you know, you have investment in that ongoing education, how they are illegible to interact [... 6:31] with other members of the health care teams.
			17	Dus je moet enorm inzetten op je people management, op je ontwikkelmogelijkheden	So, you must focus enormously on your people management, on your development opportunities.
16	Career advancement	Opportunities for promotion and career development	13	Maar ik vind dat er loopbaanpaden moeten ontstaan	But I think there should be career paths.
17	Organizational learning	An organization that learns from mistakes / unexpected events and continuously improving	3	Is het inderdaad een cultuur waarin er een soort lerend vermogen is, waarin je met elkaar er eigenlijk vanuit gaat dat je altijd alles een stap verder kunt brengen of in zo'n cultuur die eigenlijk alleen maar op de beheersing zit	Does this culture really foster a kind of learning capability, where it’s safe to assume that you can always take things a step further, or is this culture really just about [having] control?
			8	Ik denk onderdeel van de werkomgeving. Een van de onderdelen van een werkomgeving is een veilige cultuur en dat betekent ook niet alleen het vertrouwen, maar dat je de medewerkers ook schoolt dat ze naar een volgende level willen gaan op, nou ja, al is het maar op foutmeldingen. Dan kan je natuurlijk zeggen wij zijn veilig en we mogen alles melden, maar voor mij hoort daar ook bij ik doe zo omdat…	I think [it’s] part of the working environment. One of the components of a working environment is safe culture, which not only means trust, but also educating employees who want to move on to the next level, well, if only about error messages [reports or complaints]. Then, of course, you can say we’re safe and we can report anything. But for me, that’s a part of it because [I’m involved on] that …
			15	hoe open mensen gesprekken aan willen gaan over verbeteringen die er mogelijk zijn. Je ziet echt wel verschil in afdelingen die op zoek zijn naar die verbetering en afdelingen die, nou ik zeg niet alleen maar in de verdediging gaan, maar die vooral wel vinden dat ze het zelf heel goed doen. En vooral dat aan het uitstralen zijn. En natuurlijk kan het zijn dat ze hartstikke goed zijn, maar dan vin…	… how open people are to starting discussions about possible improvements. You really do see a difference between departments that are looking for improvement and departments that, let’s say, not only go on the defensive, but think they are already doing very well and radiate that [attitude] especially. And, of course, they could well be very good, but then I find the culture is not so focused on…
			16	only avialable in english	The best ward-practice environment I worked in this year, we were always encouraged to question and learn and be continuously challenging ourselves, each other and also, you know, the organization to provide the resources that we needed.
18	Personal development	Opportunities for personal growth	4	het ziekenhuis zoals het Y ook altijd wel heel erg de mogelijkheid heeft geboden om jezelf te ontwikkelen	A hospital like “Y” has always offered plenty of opportunities to develop yourself.
			10	nog een stapje verder moet er ruimte zijn, mogelijkheid zijn voor zelfontplooiing	The next step: there must be room for self-development.
19	Structural and Electronical Resources available	The availablity of enough structural, material and electronic resources to do your work	1	klimaat: temperatuur, koffie, IT ondersteuning' …. ' dat je gewoon je werk kunt doen zonder je druk te moeten maken over dat je laptop niet werkt of dat je vier weken moet wachten op je nieuwe vergunning ergens voor of nieuwe kaartje of wat dan ook	… climate: temperature, coffee, IT support: that you can do your job without worrying about your laptop not working or waiting four weeks for your permit for something, or a new ticket, whatever.
			2	ze moeten over de juiste middelen beschikken….. Materialen en middelen	They must have the right resources, materials and resources.
			4	werkomgeving…..kan te maken hebben met de inrichting van de bedden, van de afdeling. Ja, het kan te maken hebben met ondersteunende diensten. Ja, allemaal dingen die aan die werkomgeving gekoppeld zijn	… the working environment. It can relate to the layout of the beds on the ward. Yes, it can relate to support services, all the things linked to that working environment.
			8	En ik denk dat dat moderne middelen of hè, dat er uniformen zijn die bij je passen, dat je niet een kwartier in de rij moet staan voor een automaat wat niet zo goed functioneert.	And I think that modern resources [include] let’s say, uniforms that suit you, or that you don’t have to queue for fifteen minutes for an automat that doesn’t work properly.
			12	Of softe barrières die uw werk, dus alarmpjes of andere zaken, een alarmpje te veel, een alarmpje te weinig, een beter protocol, beter	Or soft obstacles on the job, alarms and things like that, one alarm too many, one alarm too little, [the need for] a better protocol…
			12	Als ge ziet hoe dat verpleegkundigen en ook artsen afzien met elektronische dossiers dat ondingen zijn en eigenlijk hun werk niet vooruit helpen, daar zit niet altijd, allez er zijn sommige goede systemen hè, maar weinig zijn, nog in vol evolutie	If you see how nurses, and doctors too, avoid using electronic records that have issues and don’t actually help their work. We’re not always there yet. Okay, there are a few good systems, but most are still in full evolution.
			13	dus dan ontstaat er nu ook veel meer de vraag om niet alleen met computer on wheels te werken, maar ook met die mobile devices mee te kunnen werken. Dus dat zijn weer nieuwe ontwikkelingen. En dus je moet dat ook als bestuur faciliteren	… so then there’s far more demand for working not only with computers on wheels, but also for being capable of working with mobile devices, those new developments. And so, as a [hospital] board, you must facilitate that too.
			17	want als jij geen goede bloeddrukmeters hebt of geen goede thermometers hebt, kun je je werk niet goed doen	… because if you don't have good blood pressure monitors or good thermometers, you can't do your job well.
20	Celebrating achievements	Celebrating accomplishments and successes
21	Rewards	Incentives and employee employee benefits system	2	Ik denk dat voor een grote groep financiële erkenning een belangrijke is	I think that a large group finds financial recognition important.
22	Job satisfaction	Satisfaction with the content of work, salary and secondary employment conditions
23	Open communication	Equal and open (blamefree) communication and feedback between professionals and different levels in an organization	1	Dat je dat niet helemaal zeker weet of iemand niet een verborgen agenda heeft. …. Dus niet eerlijk zijn, niet open, niet transparant, niet... Kijk, kritiek is zo, maar dan weet je tenminste wat je aan elkaar hebt.	… that you are not entirely sure if someone has a hidden agenda. [...] So, not being honest, not being open, not being transparent, not.... Look, criticism is like that, but at least you know where you are with each other.
			2	dat ze gewoon bij hun collega's kunnen laten zien wie ze zijn. Dat ze niet een bepaalde schijn op hoeven te houden, maar dat als er echt ook gewoon iets is dat ze naar iemand toe durven te stappen die gewoon even luistert:	… that they can show colleagues who they really are and not just keep up appearances and if something does come up they dare to approach someone who will just listen.
			7	hoe gaat men met elkaar om op het moment dat er iets fout is gegaan, een calamiteit? Hè, is er een open meldcultuur, wordt daar meteen over gepraat of is er een angstcultuur om te melden	How do you deal with each other when something goes wrong, an emergency? Is there an open culture of reporting, does it get talked about at once, or is there a culture of fear of reporting?
			14	En je ziet gewoon afdelingen waar iedereen in en uit vliegt, de sfeer niet fijn is, elkaar niet open feedback durft te geven, hè	You see wards where everyone justs flits in and out. The atmosphere is not nice, they don’t dare give each other open feedback, do they?
			15	Je moet op je werk, juist omdat je zoveel afhankelijkheden van elkaar hebt, moet je wel kunnen communiceren als je denkt dat iets anders kan, of iets beter kan	At work, precisely because you depend so much on each other, you must be able to communicate if you think that something should be done differently, if something could be done better.
			15	Maar juist omdat je als zorgprofessionals eigenlijk zo ontzettend veel moet weten en het zo afhankelijk is van het goede toepassing van wat je weet, is het ook heel logisch dat op een gegeven moment iemand een afspraak, misschien eventjes iets minder kent en is het juist heel belangrijk dat je dan dat met elkaar bespreekt en dat op een hele open wijze met elkaar bespreekt	But precisely because, as a healthcare professional, you really have to know so much and because it depends so much on applying what you know, it’s just logical that at some point someone won’t know an agreed protocol that well, perhaps, and so it’s very important that you discuss that with each other in a very open manner.
			17	Dus een hele open veilige cultuur waar je met elkaar de dingen van de dag ervoor kunt bespreken en heel open kunt praten over de dingen die eigenlijk beter hadden gemoeten of misschien wel heel goed zijn gegaan, waar je elkaar complimenten wil geven	A very open safe culture, where you can discuss things from the day before and talk openly about things that should have gone better or perhaps went well, where you want to give compliments.
24	Level of stress	A disturbed balance between the employee's experienced workload and the workload imposed by the company.
25	Conflict management	Ability to resolve conflicts
26	Trust	The extent to which employees trust the organization, their supervisors, and their coworkers	8	vertrouwen en dat je, weet je ook al... Als je een goede werkrelatie hebt, en je vertrouwt iemand en je weet dat die wat laat is, dan doe je het vaak voor de patiënt of voor je organisatie.	… trust and that you know it. (…) If you have a good working relationship, and you trust someone and you know that they are late, you’ll often do it for the patient or for your organization.
			10	ik denk niet dat je één blauwdruk voor de meest ideale werkomgeving kan geven. Ik bedoel, die dingen die ik noemde van die openheid, vertrouwen, dat geldt gewoon vrij generiek, maar wanneer je dat voert en met welke uitingen en symbolen je dat bestrijdt, dat kan nog best een beetje verschillend zijn	I don't think there is just the one blueprint for the most ideal working environment. I mean, those things I just mentioned, that openness, trust, that’s all quite generic. But when you tackle it, the expressions and symbols you use can make all the difference.
			17	Dat is vaak wat misgaat hè. Dan worden toch bepaalde mensen, ja getolereerd, en dat snapte dan de rest weer niet en dan is het vertrouwen toch eigenlijk weer weg.	That often goes wrong, eh? Then certain people get, yeah, tolerated, and the rest don’t understand why and then actually lose confidence again.
27	Participation in policy making at organisational level	Opportunity for all employees to participate in policy decisions	11	Dat de manier waarop mensen invloed kunnen hebben op hun omgeving en op een beslissing ook sterk kan bepalen hoe vrij je je voelt en hoe verantwoordelijk je je ook voelt om je eigen werkomgeving mee te bepalen. Daarbij zou ik ook wel willen benadrukken dat zo'n, ook zo'n groot huis als dit is iedereen in zijn eigen functie heeft wel degelijk vrijheid en vaak meer vrijheid dan mensen denken om mee…	The way people can influence their environment or a decision, that has a strong impact on how free you feel, how responsible you feel to set your own working environment. I’d like to emphasize that in this residence, such a big one like this, everyone is free in their own function. They often have more freedom than people would think, to help shape how we want things to look, where we want to go,…
28	Incident reporting & handling of errors	An easy-to-use system for reporting and analyzing incidents and based on this start improvements	7	Als er een incident is geweest, wordt er dan nazorg verleend	In the event of an incident, we provide aftercare.
29	Shared vision, mission	The organization has a clear mission, vision and goals that are known to employees	1	dat iedereen die bij het X werkt als je aan die zou vragen waar staat het X nou voor, dat die daar dan ook echt antwoord kan geven en ook echt in z'n praktijk uitvoert	… if you asked everyone who works at the “X” [hospital] what the “X” stands for, that they really could answer [that question] and actually implement [that value] in their practice.
			12	En een discussie over kwaliteit of uw richting van de afdeling, dat is ook werkomgeving	A discussion about quality, or the direction of your department, that’s also working environment.
			14	het eerste, dat je gewoon goed een focus moet hebben op hoe richt je zo'n afdeling in en waar is je afdeling eigenlijk voor bestemd. ….	… first, you have to focus on how to set up the ward and what it is actually intended for.
			14	ze hebben behoefte aan dat je als ziekenhuis, als afdeling een visie hebt op wat je wil.	They [employees] need you as a hospital, as a ward, to have a vision of what you want.
			15	Duidelijke doelen, een missie waar je als afdeling van bent, dus dat je met elkaar een duidelijke strategie hebt waar je aan werkt	… clear goals, a departmental mission, so that together you have a clear strategy for what you are working on.
30	Patient centered culture	The care is tailored to the patient and his loved ones' values, preferences and needs	6	hoe patient- en familiy-centered is je zorg nou eigenlijk en dus ook je omgeving	How patient- and family-centred is your care and therefore your environment?
			8	En dat duidelijk is waarom dat patiënt gericht werken of dat alles wat je doet dat dat toch enigszins het belang van de patiënt moet dienen	Clearly, that’s why patient-centred [care], everything you do, should serve the patient's interests to some extent.
31	Feeling valued	Others give you the feeling that your effort and contribution is valuable	1	dat er waardering is voor wat je doet,	… that you get appreciated for what you do.
			2	Gewoon weten dat je er mag zijn en dat het goed is wat je doet.	Just knowing that you can be there and that what you do is good.
			3	ze zich gehoord en gewaardeerd voelen	… that they feel heard and appreciated.
			9	de meest belangrijke is dat je je ieder geval wel gewaardeerd voelt. En waardering dat kun je voelen doordat mensen af en toe eens roepen dat je het goed doet	Most important is always feeling appreciated. And you can feel that because people occasionally tell you how well you’re doing.
32	Performance measurement	Measuring quality performance and patient outcomes	15	door operationeel en visueel management meer te promoten, zodat er meer een omgeving ontstaat waarin mensen meer met elkaar in gesprek gaan en dat ze dus eigenlijk zelf dat leren dus steeds meer gaan doen en die eigen verantwoordelijkheid gaan pakken	… by promoting operational and visual management more, so you create more of an environment where people talk more and actually teach themselves to do more and take on more responsibility.
33	Self-care	Attention for health and well being of employees
34	Job retainment	Attractiveness of the organization and retention of staff	17	We hebben afdelingen, de acute opname is bij ons zo'n afdeling, waar de cultuur echt heel erg goed is ontwikkeld en dat is de meest populaire afdeling voor verpleegkundigen.	We have wards where the culture is really well-developed. Acute admission is one of our wards and it’s the most popular ward for nurses.
35	Employees as valuable partners	Employees are viewed as assets and valued partners
36	Adequate authorization & clear chain of command	Clear formal hierarchical leadership and clarity in descision making
37	Physical comfort	Attention to physical working conditions with, for example, support materials (e.g. hoists)	6	En dan kan je het zelfs nog hebben over het puur fysieke van een werkomgeving. Dat als alles te klein is en te krap en te moeilijk te bereiken bijvoorbeeld	And then you could mention the purely physical aspects of a working environment. If anything is too small or too tight or too hard to get at, for example.
			6	Dus aan de ene kant dat technische, fysieke en dat slim dingen ontwerpen en slim neerzetten, zodat het uitnodigt, dat het prettig is om mee te werken, dat je er op de goede manier mee werkt	… putting in place the technical, the physical, smart designs and smart things, inviting things that are pleasant to work with [and that ensure] you work with them in the right way.
			11	Een paar dingen in de setting zijn heel letterlijk omgeving, is een gebouw, is een plek, is hoe het er uit ziet. Dat is heel banaal, maar dat is een deel van je werkomgeving: waar zit je nu.	A few things in the setting are literally the environment, the building, the place, what it looks like. It’s very banal, but it is part of your working environment: where you are now.
			11	oud gebouw, ik wil niet zeggen achterstallig onderhoud, maar voor ons natuurlijk, dat is een setting. Dat wil niet zeggen dat je daar niet fantastisch kan werken en dat je daar geweldige collega's kan hebben, maar soms bepaalt het wel een beetje de sfeer, althans in mijn overtuiging	… old building. I don't want to say that maintenance is overdue, but for us, of course, it’s our setting. That’s not to say that you can’t do fantastic work here or that you can’t have great colleagues here, but sometimes it does influence the atmosphere a bit, at least in my opinion.
			16	only avialable in english	I think that the design of the environment, you know, the practice environment, makes a difference in how easy it is to literally look after and look out for patients.
			16	only avialable in english	So, what I should also have mentioned about the physical and psychological environment is that it has an aesthetic element too. Does it look and feel good?
38	Information distrubution	Information needed to perform the work is distributed and shared
39	Working according to guidelines	Working according to professional standards and guidelines	4	werkomgeving kan met protocollen te maken hebben. Bestaan die wel of bestaan die niet.	The working environment may have to do with protocols. Do or do they not exist?
40	Working conditions	The ability of employees to do their job within time and resources
41	Role clarity	Having an understanding about the duties, responsibilities and competences.	1	dat duidelijk is wat je moet doen	… that what we have to do is clear.
			17	En dat heeft dus te maken met zelfsturing, eigen verantwoordelijkheid nemen. En mensen die graag eigen verantwoordelijkheid nemen die hebben niet zo snel last van rolonduidelijkheid.	And that has to do with self-management, taking personal responsibility. And people who like taking their own responsibility don’t easily suffer from role uncertainty.
42	Internal work motivation	Intrinsic motivation completely independent of external factors such as salary, colleagues or supervision	5	als dat je weet dat je er van bent en dat je dus intrinsieke motivatie hebt dat je ergens van bent. En dat je ook dat persoonlijk leiderschap op je neemt om dan vervolgens ergens van te zijn	… if you know you are there and that you have the intrinsic motivation to be something. And that you take on that personal leadership and make something of it.
			5	Het ... ding is dat je eigenlijk het gevoel hebt dat jouw meesterschap wordt versterkt, doordat je dit nu gaat doen. Dus het gaat jouw professionele eer ook verder een boost geven. En... dat je, dat het een hoger doel dient, dat dat wat je gaat doen dat dat iets is waarvan je denk: nou dit is wel echt goed om te doen	The thing is that you feel that you’re enhancing your mastery by doing this now. So, it boosts your professional pride. [...] You feel like you’re serving a higher purpose, that what you are going to do makes you think: well this is a really good thing to do.
			17	Want het vak, iedereen is natuurlijk intrinsiek gemotiveerd om het goed te doen, maar jij kunt nog zo goed gemotiveerd zijn, maar als je omgeving daar niet goed mee omgaat, positief op reageert,..., dan ja, dan wordt het op een gegeven moment ook een beetje zeg maar een baan.	Because in this profession, everyone is of course intrinsically motivated to do well, but even when you are well-motivated, if your environment does not treat you well, doesn’t respond positively then, yes, at a certain point, let’s say, it [the profession] turns into just any old a job.
43	Cultural values	Attitude, behaviour and policy: the way that 'we do things' in the organization and work units	1	Dus je hebt voor een goede werkomgeving ook, behalve de letterlijk fysieke omgeving en de structuren die er zijn in een bedrijf, heb je ook een cultuur nodig die daarbij past. En cultuur kan je maken, maar dat is alleen moeilijk.	So, for a good working environment, besides the literally physical environment and the structures in the company, you also need a suitable culture. And you can make a culture but it’s really difficult.
			5	En die tribale achtergrond die maakt dat zij zich binnen die tribe met elkaar optrekken vanwege bepaalde waarden en normen die ze met elkaar hebben gedefinieerd. En die tribe geeft ze veiligheid.	And that tribal background causes them to interact inside the tribe because they have defined certain values and norms together. And that tribe gives them safety.
			7	Het is ook gewoon cultuur. Dat is gewoon binnenkomen op je werk, hoe gaan collega's met elkaar om, wordt er gegroet ja of nee, is er belangstelling voor elkaar: hoe was je dag?	It’s just the ordinary culture. Turning up to work, how do colleagues treat each other? Do they greet each other, yes or no? Are people interested in each other: how was your day?
			9	Maar dat hoort gewoon bij een positieve organisatiecultuur." Als jij zegt van: "Wij vinden het essentieel dat iedereen elkaar gedag zegt in het ziekenhuis, dan moet je je daar ook aan houden en degene die dat niet wil doen en daarop aangesproken wordt en het nog steeds niet doet, dan ben jij niet meer welkom	That’s just part of a positive organizational culture. If you say “In this hospital we find it essential that everyone says goodbye to each other” then you have to stick to that and the person who does not want to do it gets called to account. And if they still refuse, then they are no longer welcome.
44	Innovation and change readiness	Innovation is encouraged and employees and management are willing to change	1	het bureaucratische van projectvoering. Dus dat als je een nieuw idee hebt, dat dat gewoon niet van de grond komt, omdat het strandt in stroperigheid van projectmanagement of van commissie's of van mensen die er over moeten oordelen en die dan weer drie weken moeten wachten	… the bureaucracy of project management. Like, if you have a new idea, it just doesn't get off the ground because it gets bogged down by project management or committees or people who have to evaluate [the idea and keep you] waiting three weeks.
			3	in een klimaat te werken, waarin je met elkaar bijvoorbeeld kwaliteit heel belangrijk vind, waarin bijvoorbeeld cultuur van willen vernieuwen, willen verbeteren en je vragen blijven stellen	… working in a climate that finds quality very important, for example, a culture that wants to innovate, wants to improve and keeps you asking your questions.
			4	het werken in complexe omgevingen en daar, ja, de goede dingen doen, met leiderschap bezig zijn, altijd op zoek naar nieuwe dingen, mogelijkheden.	… working in complex environments and, yes, doing the right thing, being involved in leadership, always looking out for new things, opportunities.
			11	En dat heeft ook in de cultuur te maken met krijg je je zaken op orde en hoe snel implementeer je wat nieuws. En dat zit in de hele kleine dingen, met voorbeeldfunctie van mensen die daarmee ook aangeven zo doen we dat hier	And the culture also has to do with getting your things in order and how quickly you implement something new. And it’s in the very small things, with people making an example, showing that’s how we do things here…
45	Justice	Appropriate and fair way of making decisions
46	Task orientation	A clear division of tasks	15	duidelijke taakverdeling, zodat iedereen weet wat er van hem verwacht wordt	… clear division of tasks, so that everyone knows what is expected of them.
47	Challenging and fun work	Having fun and being challenged at work	14	Je moet het gewoon leuk vinden hè, we hebben het wel een beetje aangeraakt, maar je moet het gewoon leuk vinden om op een goede plek te zitten waar je het naar je zin hebt.	You’ve got to enjoy it. We touched on that a bit, you just have to like being in a good spot where you can have a good time.
			16	only avialable in english	I would also add, [having] a big sense of humour.
			17	Dat is een omgeving waar er dagelijks met elkaar gesproken wordt over hoe leuk was het gisteren, maar wat hebben we van gisteren geleerd en wat kunnen we vandaag beter doen.	This is a daily environment where people talk about how much fun they had yesterday, but also ask [themselves] what did we learn from yesterday and what can we do better today?
48	Safety climate	The perception of a safety culture	1	ik vind veiligheidscultuur belangrijk en zeker in de omgeving als deze.... maar het is te beperkt, dus het zou onderdeel moeten zijn van een goede werkomgeving	I think safety culture is important, especially in an environment like this […] but it’s too limited. It should be part of a good working environment.
			2	Mensen moeten zich veilig voelen allereerst. Veilig tussen collega's, maar ook veilig om vakken uit te voeren.	First, people should feel safe, safe with their colleagues, but also safe to carry out their specialisms.
			8	Dus dat er een veilige werkcultuur is, dat er een werkomgeving is waar je kan leren, maar waar ook de veiligheid fysiek natuurlijk is, maar ook psychisch	… so that there is a safe culture, a working environment where you can learn, but where safety, including psychological safety, is a natural aspect.
			10	een open proactieve veiligheidscultuur is toch wat gezien wordt als positief, want daar kan je als er iets niet goed gaat, kun je bespreken.	An open, proactive safety culture is regarded as positive, because if something goes wrong, you can always discuss it.
			13	ook fouten mogen maken, maar niet elke dag dezelfde fouten maken. …. daar hoort ook bij dat dingen ook niet goed mogen gaan. En dat daar over gesproken mag worden.	… also being allowed to make mistakes, but not the same mistakes every day. […] This should include the things that do not go well. And that you can discuss this.
			16	only avialable in english	But I think it also has to be kind of a just culture, by that I mean the fear culture, that you know that the leader will also pick up on things that are not good. You know they’re not just going to sweep things under the carpet. They create, they recognize, they say: "Yes you're right, you have to do something about it, this isn't how it should be.”
